# Supplementary material for: Tuning the ion conductivity of Zr-based metal–organic framework ionogels by linker functionalization
Source: Royal Society of Chemistry journal article supplement (doi:10.1039/d3ta06986a), 2024-01-01
Supplement: d3ta06986a1.pdf [file d3ta06986a1.pdf]

— Electronic Supplementary Information —

# Tuning the ion conductivity of Zr-based metal organic framework ionogels by linker functionalization

Antonija Ferbezar,<sup>†</sup> Roman Zettl,<sup>†</sup> Katharina Hogrefe,<sup>†</sup> Harald Fitzek,<sup>‡</sup> Bernhard  
Gadermaier,<sup>†</sup> H. Martin R. Wilkening,<sup>†,¶</sup> and Ilie Hanzu<sup>\*,†,¶</sup>

<sup>†</sup>*Institute of Chemistry and Technology of Materials, Graz University of Technology (NAWI  
Graz), Stremayrgasse 9, 8010 Graz, Austria*

<sup>‡</sup>*Graz Centre for Electron Microscopy (FELMI-ZFE), Steyrergasse 17, 8010 Graz, Austria*

<sup>¶</sup>*Alistore – ERI European Research Institute, CNRS FR3104, Hub de l’Energie, Rue  
Baudelocque, F-80039 Amiens, France*

E-mail: hanzu@tugraz.at

Table S1: The list of chemicals and solvents used for the experiments

| Name                                                    | Supplier      | CAS-Number  |
|---------------------------------------------------------|---------------|-------------|
| Zirconium(IV) chloride $\geq 99.5\%$ trace metals basis | Sigma-Aldrich | 10026-11-6  |
| Terephthalic acid 98%                                   | Sigma-Aldrich | 100-21-0    |
| 2-Aminoterephthalic acid 99%                            | Sigma-Aldrich | 10312-55-7  |
| 2,5-Dihydroxyterephthalic acid 97%                      | abcr GmbH     | 610-92-4    |
| Hydrochloric acid fuming 37 %                           | Merck KGaA    | 7647-01-0   |
| N,N-Dimethylformamide $\geq 99.5\%$                     | Carl Roth     | 68-12-2     |
| Selectipur <sup>®</sup> Dimethylcarbonate, anhydrous    | Merck KGaA    | 616-38-6    |
| 1-Ethyl-3-methylimidazolium bis(fluorosulfonyl)imide    | proionic      | 235789-75-0 |
| Tetrahydrofuran, anhydrous, 99.8+%, unstab.             | Alfa Aesar    | 109-99-9    |
| Methanol                                                | Merck KGaA    | 67-56-1     |
| 3-Methyl-3-pentanol                                     | Sigma-Aldrich | 77-74-7     |

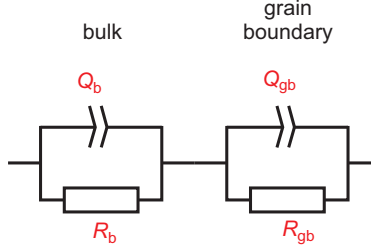

Figure S1: Equivalent circuit used to fit the impedance data at of IL@UiO-66-Li, IL@UiO-66-NH<sub>2</sub>-Li, IL@UiO-66-(OH)<sub>2</sub>-Li. In addition, for the IL@UiO-66-Li samples a simpler equivalent circuit consisting of only a single RQ unit was used. Q denotes constant phase element.

Table S2: Lattice parameter  $a$  obtained from Rietveld refinement and average crystallite size  $r$  estimated by using the Scherrer equation, assuming spherical crystallites, for the three MOF materials used in this study.

|                  | UiO-66 | UiO-66-NH <sub>2</sub> | UiO-66-(OH) <sub>2</sub> |
|------------------|--------|------------------------|--------------------------|
| $a / \text{\AA}$ | 20.725 | 20.778                 | 20.820                   |
| $r / \text{nm}$  | 45     | 50                     | 20                       |

Table S3: Measured BET specific surface area and comparison with values from literature (Katz *et al.*, *Chemical Communications*, **2013**, 49, 9449, DOI: 10.1039/C3CC46105J).

| $S_{\text{BET}} / \text{m}^2\text{g}^{-1}$ | Literature | Obtained |
|--------------------------------------------|------------|----------|
| UiO-66                                     | 1580       | 1520     |
| UiO-66-NH <sub>2</sub>                     | 1200       | 1297     |
| UiO-66-(OH) <sub>2</sub>                   | 560        | 441      |

Table S4: Measured average pore size according to the BJH model. Pore size distribution plots are shown in Figure S5 b) – d).

| Diameter / $\text{\AA}$  | Tetrahedral pore | Octahedral pore |
|--------------------------|------------------|-----------------|
| UiO-66                   | 6.3              | 17.7            |
| UiO-66-NH <sub>2</sub>   | 6.3              | 16.7            |
| UiO-66-(OH) <sub>2</sub> | 6.3              | 17.7            |

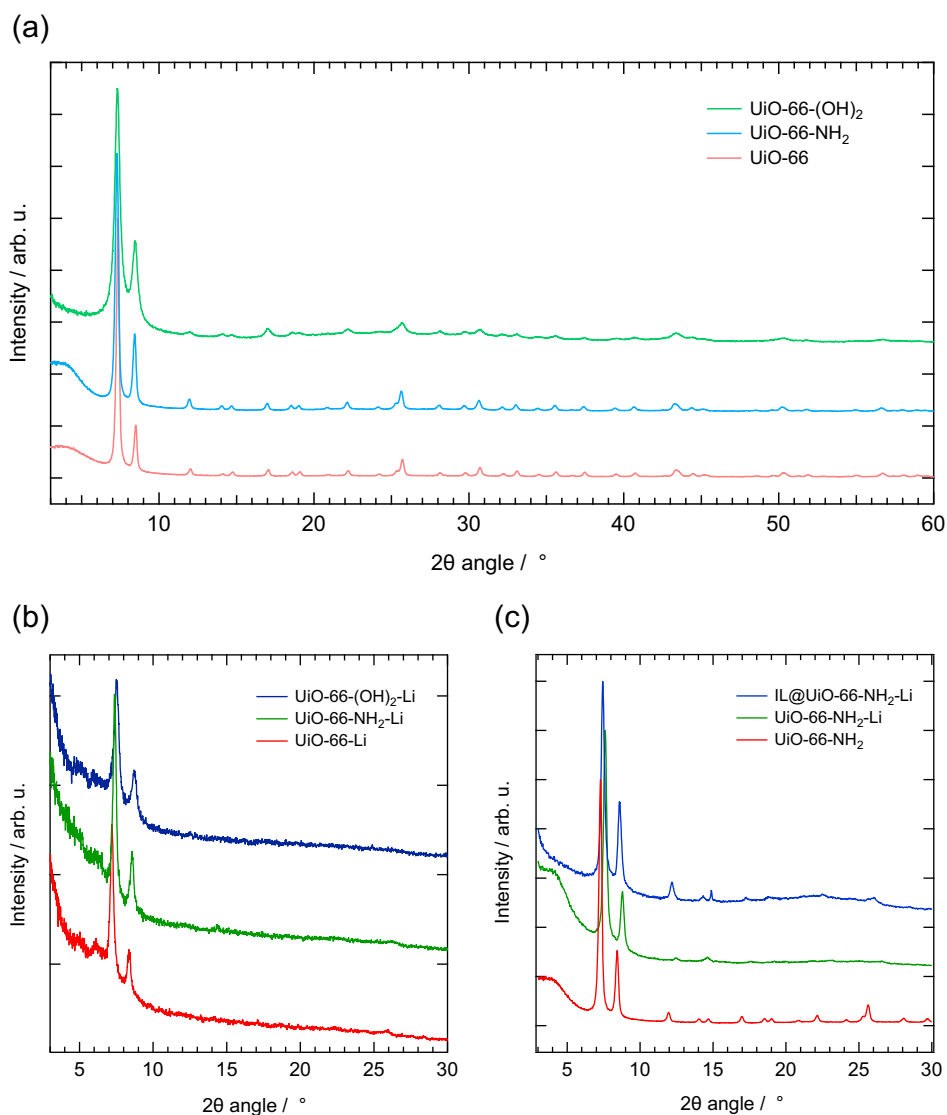

Figure S2: (a) X-ray diffraction patterns of UiO-66, UiO-66-NH<sub>2</sub>, UiO-66-(OH)<sub>2</sub> after activation. The three MOF variants are iso-structural, crystallize with the cubic  $Fm\text{-}3m$  symmetry and show only very small differences of lattice parameters. (b) X-ray diffraction patterns of UiO-66, UiO-66-NH<sub>2</sub>, UiO-66-(OH)<sub>2</sub> after alkoxide grafting. (c) X-ray diffraction patterns of the amine-functionalized MOF measured at successive preparation steps: activated MOF (UiO-66-NH<sub>2</sub>), alkoxide-grafted MOF (UiO-66-NH<sub>2</sub>-Li) and alkoxide-grafted MOF soaked with ionic liquid (IL@UiO-66-NH<sub>2</sub>-Li).

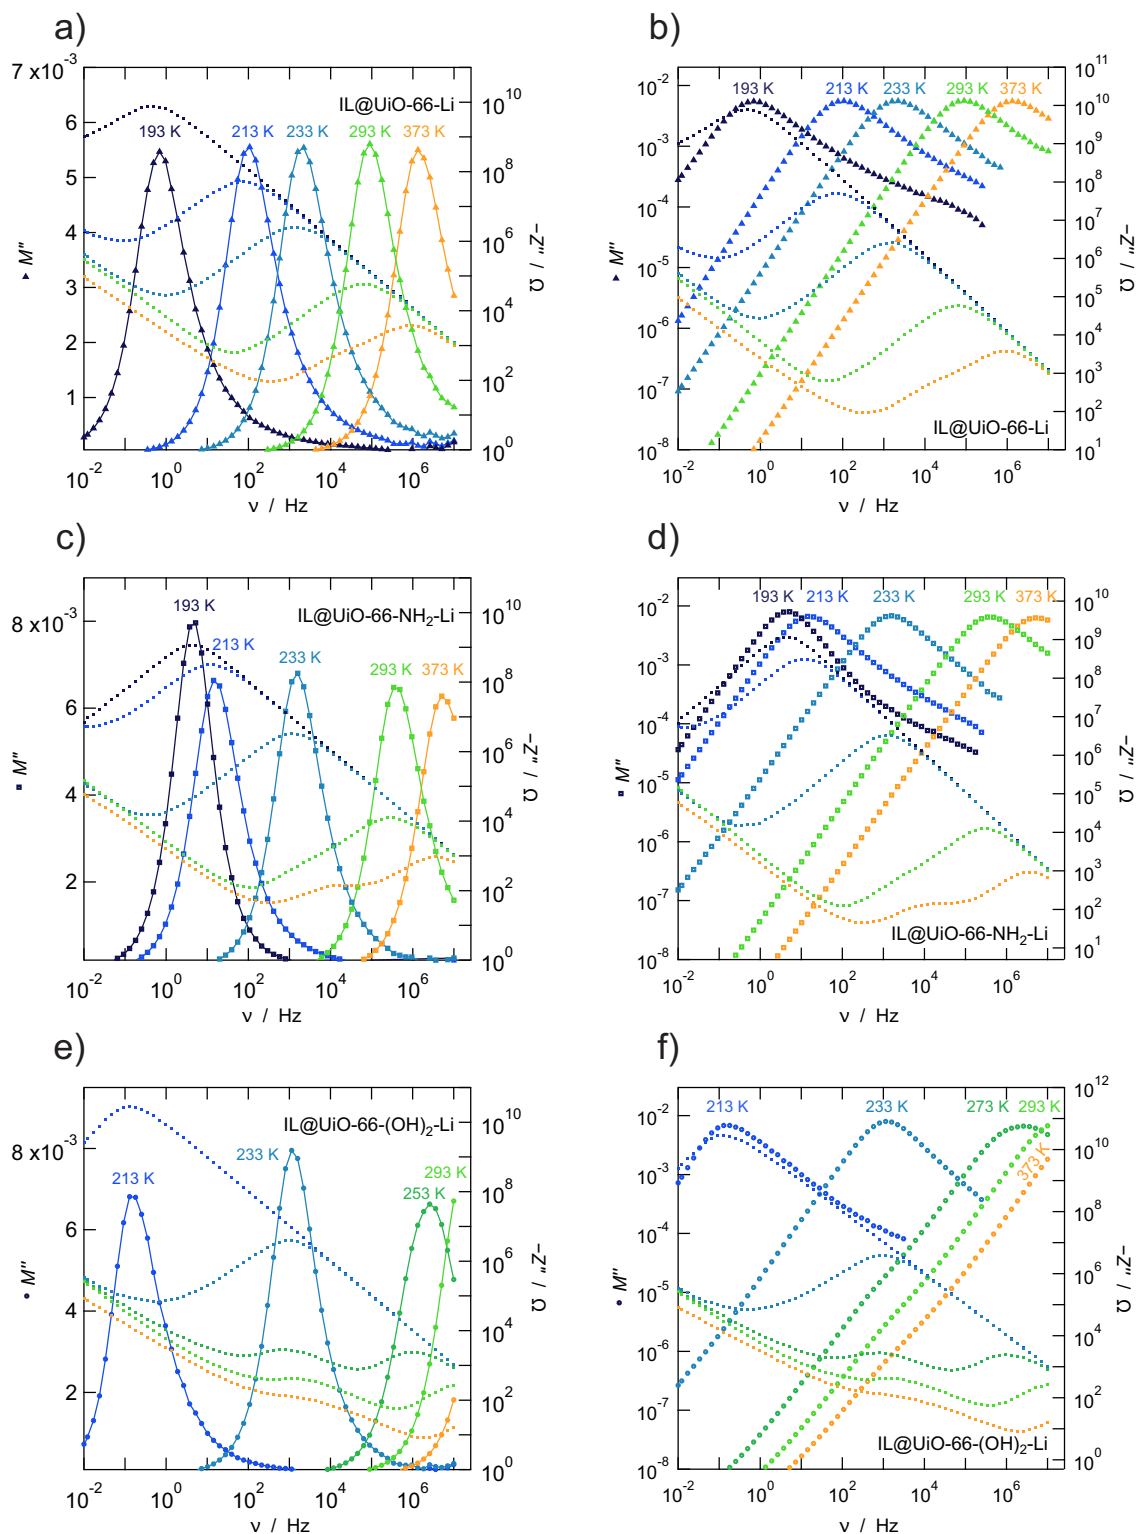

Figure S3: The imaginary part of the electric modulus  $M''$  plotted on both linear and logarithmic scales for the three lithium containing samples. On the right axis the imaginary part of the impedance  $-Z''$  is shown. While IL@UiO-66-Li and IL@UiO-66-NH<sub>2</sub>-Li show a similar behavior, IL@UiO-66-(OH)<sub>2</sub>-Li reveals a distinct electric relaxation behavior, very likely the mobile charged species are different from the other two samples.

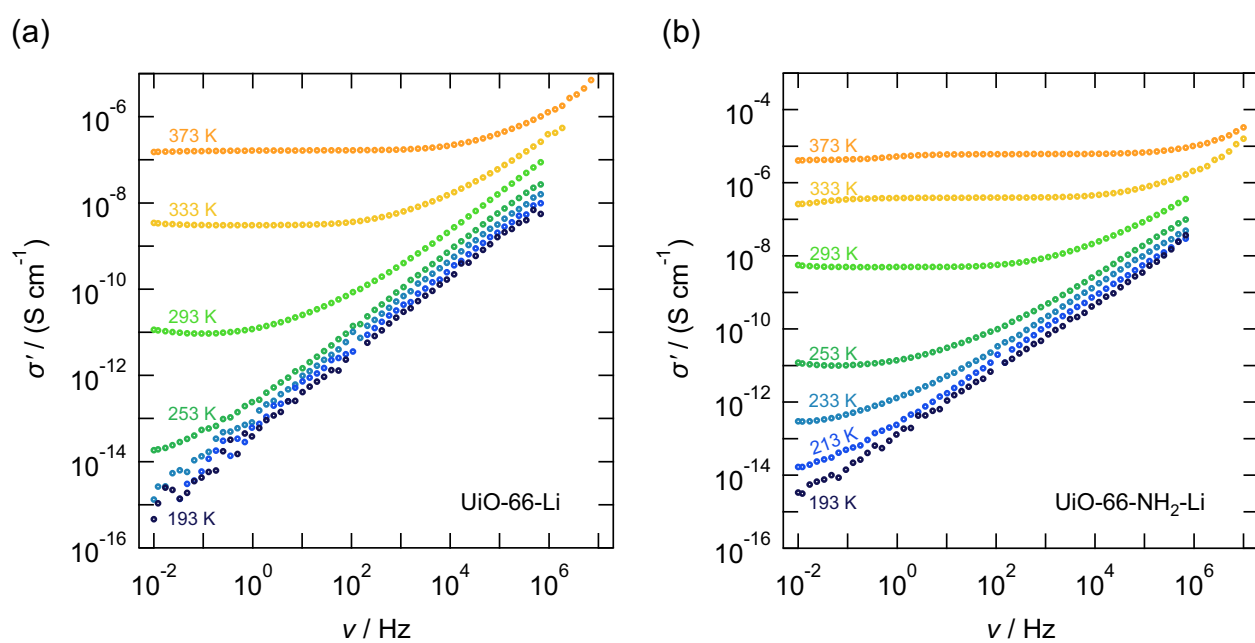

Figure S4: Conductivity isotherms of a) UiO-66-Li and b) UiO-66-NH<sub>2</sub>-Li. The figure shows lithium alkoxide samples grafted samples without any ionic liquid added.

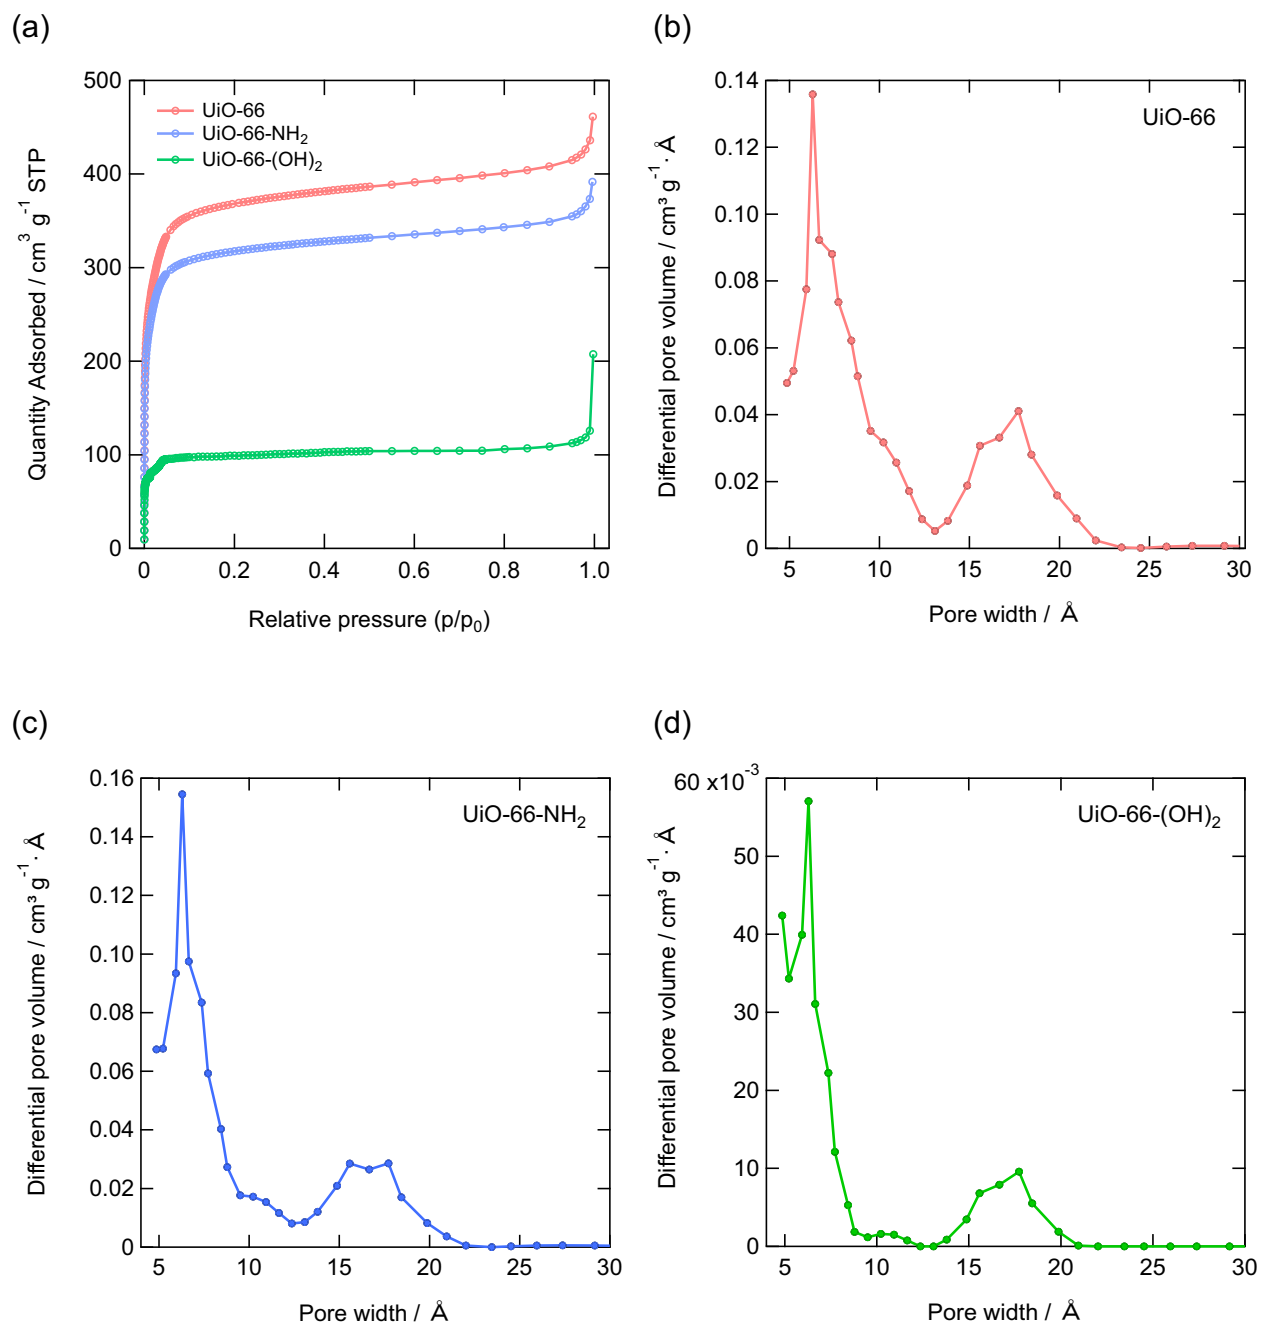

Figure S5: (a) N<sub>2</sub> adsorption isotherms at 77 K of the activated MOFs used for the determination of the specific surface area according to the Brunauer-Emmet-Teller (BET) method. b), c), and d) Pore size distribution plots according to the Barrett–Joyner–Halenda (BJH) model.
